# Supplementary material for: Increasing vaccine production using pulsed ultrasound waves
Source: PLoS One. 2017 Nov 27;12(11):e0187048. doi: 10.1371/journal.pone.0187048 (PMC5703500; doi:10.1371/journal.pone.0187048)
Supplement: S1 File — (XLSX) [file pone.0187048.s001.xlsx]

## Sheet: Sheet1
	24h	48h	72h	96h			24h	48h	72h	96h
Control	0.78	1.24	2.15	3.89		Control	0.685	1.41	2.45	4.05
60 mW	0.77	1.37	2.67	4.78		60 mW	0.985	1.535	2.54	5.01
80 mW	0.8	1.15	1.85	3.43		80 mW	0.8	1.31	2.39	3.58
Average	24h	48h	72h	96h		Stdev	24h	48h	72h	96h
Control	0.7325	1.325	2.3	3.97		Control	0.132993	0.124212	0.120478	0.148487
60 mW	0.8775	1.4525	2.605	4.895		60 mW	0.166217	0.153798	0.14539	0.18454
80 mW	0.8	1.23	2.12	3.505		80 mW	0.110609	0.103437	0.101562	0.124031
