# Supplementary material for: Increasing vaccine production using pulsed ultrasound waves
Source: PLoS One. 2017 Nov 27;12(11):e0187048. doi: 10.1371/journal.pone.0187048 (PMC5703500; doi:10.1371/journal.pone.0187048)
Supplement: S2 File — (XLSX) [file pone.0187048.s002.xlsx]

## Sheet: Sheet1
	Viable cell count(M/ml)
	Control
	10 minutes per treatment and one treatment per day
	10 minutes per treatment and two treatments per day
	15 minutes per treatment and one treatment per day
	Average		24h	48h	72h	96h	120h		Devation		24h	48h	72h	96h	120h
		Control	0.655	1.005	1.6225	3.3975	5.405			Control	0.0353553	0.0141421	0.0601041	0.109602	0.0636396
		10 minutes per treatment and one treatment per day	0.65	1.15	1.8825	3.79	6.645			10 minutes per treatment and one treatment per day	0.0353553	0.141421	0.144957	0.190919	0.381838
		10 minutes per treatment and two treatments per day	0.645	1.0225	1.7725	3.635	5.475			10 minutes per treatment and two treatments per day	0.0353553	0.0601041	0.0813173	0.0989949	0.53033
		15 minutes per treatment and one treatment per day	0.6425	1.05	1.9075	3.8175	6.2725			15 minutes per treatment and one treatment per day	0.0247487	0.0565685	0.0813173	0.0388909	0.272236
Average		24h	48h	72h	96h	120h		Devation		24h	48h	72h	96h	120h
	Control	0.625	1.1575	2.2925	4.14	5.9275			Control	0.0141421	0.137886	0.350018	0.19799	0.540937
	10 minutes per treatment and one treatment per day	0.615	1.5025	3.0975	5.0375	8.635			10 minutes per treatment and one treatment per day	0.0212132	0.10253	0.251023	0.16617	0.275772
	15 minutes per treatment and one treatment per day	0.62	1.3025	2.67	4.62	7.3425			15 minutes per treatment and one treatment per day	0.0212132	0.0459619	0.311127	0.190919	0.512652
